# Supplementary material for: The Efficacy and Safety of Chinese Herbal Medicine in the Treatment of Knee Osteoarthritis: An Updated Systematic Review and Meta‐Analysis of 56 Randomized Controlled Trials
Source: Hindawi journal article supplement (doi:10.1155/2022/6887988), 2022-01-01
Supplement: f1 [file 6887988.f1.zip]

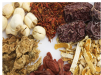

Chinese herbal medicine

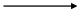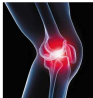

Knee Osteoarthritis

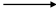

Search

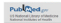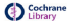

Embase®

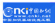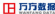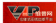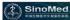

Database

Meta-analysis of  
5350 patients

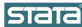

VAS ↓  
WOMAC ↓  
Lequesne index ↓  
Lysholm score ↑  
Total effective rate ↑  
Adverse events ↓

Chinese herbal medicine

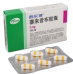

NSAIDS

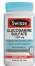

Glucosamine
